# Supplementary material for: Methylthio BODIPY as a standard triplet photosensitizer for singlet oxygen production: a photophysical study
Source: Royal Society of Chemistry journal article supplement (doi:10.1039/c9cp03454d), 2019-01-01
Supplement: c9cp03454d1.pdf [file c9cp03454d1.pdf]

## Supplementary information for:

### Methylthio BODIPY as a standard triplet photosensitizer for singlet oxygen production: a photophysical study

Ruth Prieto-Montero,<sup>1</sup> Rebeca Sola-Llano,<sup>1</sup> Raul Montero,<sup>2</sup> Asier Longarte,<sup>3</sup> Teresa Arbeloa,<sup>1</sup>  
Iñigo López-Arbeloa,<sup>1</sup> Virginia Martínez-Martínez<sup>1,\*</sup> and Sylvie Lacombe<sup>4,\*</sup>

<sup>1</sup> Molecular Spectroscopy Group, Departamento de Química Física, Facultad de Ciencia y Tecnología, Universidad del País Vasco, UPV/EHU, Apartado 644, 48080 Bilbao, Spain

<sup>2</sup> SGIker Laser Facility, Universidad del País Vasco (UPV/EHU), Sarriena s/n, 48940 Leioa, Spain

<sup>3</sup> Spectroscopy Laboratory, Departamento de Química Física, Facultad de Ciencia y Tecnología, Universidad del País Vasco, UPV/EHU, Apartado 644, 48080 Bilbao, Spain

<sup>4</sup> CNRS/ Univ. Pau & Pays Adour/ E2S UPPA, IPREM, Institut des sciences analytiques et de Physicochimie pour l'environnement et les Matériaux, UMR5254, Hélioparc, 2 avenue Président Angot, 64053, PAU cedex 9, France

### Table of contents:

|                                                                                                                                      |        |
|--------------------------------------------------------------------------------------------------------------------------------------|--------|
| 1. General scheme and kinetic equations for singlet oxygen production.....                                                           | S2     |
| 2. Quantum yields of singlet oxygen production by phosphorescence emission at 1276 nm and quenching of singlet oxygen by MeSBDP..... | S3     |
| 3. Determination of the rate constant of quenching of triplet state of MeSBDP by $\beta$ -carotene as triplet acceptor.....          | S5     |
| Table S2-S4.....                                                                                                                     | S6-S7  |
| Figures S1-S10.....                                                                                                                  | S7-S12 |
| References.....                                                                                                                      | S12    |

# 1. General scheme and kinetic equations for singlet oxygen production

Table S1: Kinetic equations of singlet oxygen production and decay (when using  $O_2$ , we refer to  $O_2(X^3\Sigma_g)$  ground state oxygen)

|                                                                             | Kinetic equation                                                                                                                           | Process                                      |         |
|-----------------------------------------------------------------------------|--------------------------------------------------------------------------------------------------------------------------------------------|----------------------------------------------|---------|
| <b>Singlet state (<math>^1PS^*</math>) formation and decay</b>              |                                                                                                                                            |                                              |         |
|                                                                             | $\frac{d[{}^1PS^*]}{dt} = P_a^{PS} - k_{ISC}[{}^1PS^*] - k_F[{}^1PS^*] - k_{IC}[{}^1PS^*]$                                                 |                                              | Eq. S1  |
| $PS \xrightarrow{h\nu} {}^1PS^*$                                            | $P_a^{PS}$                                                                                                                                 | Light absorption                             | Eq. S2  |
| ${}^1PS^* \xrightarrow{k_{flu}} PS + h\nu_F$                                | $-k_{fl}[{}^1PS^*]$                                                                                                                        | Fluorescence (radiative decay)               | Eq. S3  |
| ${}^1PS^* \xrightarrow{k_{ISC}} {}^3PS^*$                                   | $-k_{ISC}[{}^1PS^*]$                                                                                                                       | Intersystem crossing                         | Eq. S4  |
| ${}^1PS^* \xrightarrow{k_{IC}} PS$                                          | $-k_{IC}[{}^1PS^*]$                                                                                                                        | Internal conversion                          | Eq. S5  |
|                                                                             | $k_{nr}^S = k_{IC} + k_{ISC}$                                                                                                              | Non radiative decay                          | Eq. S6  |
| <b>Triplet state (<math>^3PS^*</math>) decay</b>                            |                                                                                                                                            |                                              |         |
|                                                                             | $\frac{d[{}^3PS^*]}{dt} = -k_r[{}^3PS^*] - k_{nr}[{}^3PS^*] - k_{en}[O_2][{}^3PS^*] - k_{Td}^{O_2}[O_2][{}^3PS^*] - k_{CT}[O_2][{}^3PS^*]$ |                                              | Eq. S7  |
| ${}^3PS^* \longrightarrow PS + h\nu_P$                                      | $-k_r^T[{}^3PS^*]$                                                                                                                         | Phosphorescence                              | Eq. S8  |
| ${}^3PS^* \longrightarrow PS$                                               | $-k_{nr}^T[{}^3PS^*]$                                                                                                                      | Non-radiative decay                          | Eq. S9  |
| ${}^3PS^* + O_2 \longrightarrow PS + {}^1O_2$                               | $-k_{en}[O_2][{}^3PS^*]$                                                                                                                   | Energy transfer                              | Eq. S10 |
| ${}^3PS^* + O_2 \longrightarrow PS + O_2$                                   | $-k_{TD}^{O_2}[O_2][{}^3PS^*]$                                                                                                             | Physical deactivation of ${}^3PS^*$ by $O_2$ | Eq. S11 |
| ${}^3PS^* + O_2 \longrightarrow \text{others}$                              | $-k_{CT}[O_2][{}^3PS^*]$                                                                                                                   | Other processes (electron transfer,...)      | Eq. S12 |
|                                                                             | $k^T = k_r^T + k_{nr}^T$                                                                                                                   | Deactivation of the triplet state            | Eq. S13 |
|                                                                             | $k_{q,O_2}^T = k_{en} + k_{TD}^{O_2} + k_{CT}$                                                                                             | Quenching of the triplet state by $O_2$      | Eq. S14 |
| <b>Deactivation of <math>{}^1O_2</math> in the absence of a quencher</b>    |                                                                                                                                            |                                              |         |
|                                                                             | $\frac{d[{}^1O_2]}{dt} = -k_e[{}^1O_2] - k_d[{}^1O_2]$                                                                                     |                                              | Eq. S15 |
| ${}^1O_2 \longrightarrow O_2 + h\nu_P$                                      | $-k_e[{}^1O_2]$                                                                                                                            | Radiative decay                              | Eq. S16 |
| ${}^1O_2 \longrightarrow O_2$                                               | $-k_d[{}^1O_2]$                                                                                                                            | Non-radiative decay                          | Eq. S17 |
| with                                                                        | $k_e \ll k_d$                                                                                                                              |                                              | Eq. S18 |
| <b>Deactivation of <math>{}^1O_2</math> in the presence of a quencher Q</b> |                                                                                                                                            |                                              |         |
|                                                                             | $\frac{d[{}^1O_2]}{dt} = -k_e[{}^1O_2] - k_d[{}^1O_2] - k_r^Q[{}^1O_2][Q] - k_q^Q[{}^1O_2][Q]$                                             |                                              | Eq. S19 |
| ${}^1O_2 + Q \longrightarrow \text{products}$                               | $-k_r^Q[{}^1O_2][Q]$                                                                                                                       | Chemical quenching of ${}^1O_2$              | Eq. S20 |
| ${}^1O_2 + Q \longrightarrow Q + O_2$                                       | $-k_q^Q[{}^1O_2][Q]$                                                                                                                       | Physical quenching of ${}^1O_2$              | Eq. S21 |
|                                                                             | $k_t^Q = k_r^Q + k_q^Q$                                                                                                                    | Total quenching of ${}^1O_2$ by Q            | Eq. S22 |

The quantum yield of singlet oxygen ( $^1\text{O}_2$ ) production ( $\phi_\Delta$ ) is defined as:

$$\phi_\Delta = \phi_T \phi_{en} = \phi_T \frac{k_{en}[\text{O}_2]}{k_r^T + k_{nr}^T + k_{q,\text{O}_2}^T[\text{O}_2]} = \phi_T P_{\text{O}_2}^T f_\Delta^T \quad \text{Eq. S23}$$

$$\text{with } \phi_T = \frac{k_{ISC}}{k_{fl} + k_{IC} + k_{ISC}} \quad \text{Eq. S24}$$

and  $f_\Delta^T$  fraction of PS triplet excited states  $^3\text{PS}^*$  quenched by  $\text{O}_2$  yielding  $^1\text{O}_2$

$$f_\Delta^T = \frac{k_{en}}{k_{q,\text{O}_2}^T} \quad \text{Eq. S25}$$

and  $P_{\text{O}_2}^T$  fraction of triplet excited states quenched by  $\text{O}_2$

$$P_{\text{O}_2}^T = \frac{k_{q,\text{O}_2}^T[\text{O}_2]}{k_r^T + k_{nr}^T + k_{q,\text{O}_2}^T[\text{O}_2]} = 1 - \frac{\tau_T}{\tau_0^T} = 1 - \frac{I_0^T}{I_T} \quad \text{Eq. S26}$$

$\tau_0^T$  and  $I_0^T$ ,  $\tau^T$ , and  $I^T$  the lifetime and emission intensity of the sensitizer triplet excited state in the absence and presence of oxygen respectively.

## 2. Quantum yields of singlet oxygen production by phosphorescence emission at 1276 nm and quenching of singlet oxygen by MeSBDP

Under continuous irradiation of a sensitizer (PS), the quantum yield of  $^1\text{O}_2$  emission is given by:

$$\phi_e = \frac{P_e}{P_a^{PS}} = \frac{C S_e}{P_a^{PS}} = \Phi_\Delta^{PS} k_e \tau_\Delta \quad \text{Eq. S27}$$

with  $P_e$ , the photon flux emitted by singlet oxygen (phosphorescence),  $P_a^{PS}$  (einstein  $\text{L}^{-1} \text{s}^{-1}$ ) the photon flux absorbed by the sensitizer at the wavelength of excitation:

$$P_a^{PS} = P_0(1 - 10^{-A_{PS}}) = P_0 \alpha_{PS} \quad \text{Eq. S28}$$

$P_0$ , incident photon flux (einstein  $\text{L}^{-1} \text{s}^{-1}$ )

$C$ , proportionality factor depending on geometric and electronic characteristics of the detection system and on specific parameters of the medium (refractive index, NIR absorbance),

$S_e$ , the  $^1\text{O}_2$  signal intensity,

$k_e$  ( $\text{s}^{-1}$ ), the rate constant of  $^1\text{O}_2$  emission (Eq. S16) and  $\tau_\Delta$  (s) the  $^1\text{O}_2$  lifetime in the system considered. In the absence of a quencher:

$$\tau_\Delta = 1/k_d \quad \text{Eq. S29}$$

with  $k_d$  rate constant of  $^1\text{O}_2$  deactivation by the solvent (Eq. S17, since  $k_e \ll k_d$  in most solvents).<sup>1-</sup>

In the presence of a quencher that may be the photosensitizer itself (Q = PS),

$$\tau_{\Delta}^Q = \frac{1}{(k_d + k_t^Q[Q])} \quad \text{Eq. S30}$$

where  $k_t^Q$  ( $M^{-1} s^{-1}$ ) is the rate constant of  $^1O_2$  total quenching (Eq. S 22, sum of physical and chemical quenching) by Q.

Considering a possible quenching of  $^1O_2$  by the PS itself (Q = PS),  $k_t^{PS}$  and  $\Phi_{\Delta}^{PS}$  may be determined by relative measurements, using a reference sensitizer (PS<sub>Ref</sub>) of known quantum yield of singlet oxygen production ( $\Phi_{\Delta}^{PS_{Ref}}$ ). Combining Eqs. S27 to S30, the ratio of the  $^1O_2$  luminescence quantum yields for PS and PS<sub>Ref</sub> in the same solvent is given by:

$$\frac{\Phi_e^{PS}}{\Phi_e^{PS_{Ref}}} = \frac{S_{e,PS}}{S_{e,PS_{Ref}}} \times \frac{\alpha_{PS_{Ref}}}{\alpha_{PS}} = \frac{\Phi_{\Delta}^{PS}}{\Phi_{\Delta}^{PS_{Ref}}} \times \frac{(k_d + k_t^{PS_{Ref}}[PS_{Ref}])}{(k_d + k_t^{PS}[PS])} \quad \text{Eq. S31}$$

This expression assumes that the apparatus factors (C) are identical in both cases and that the PS under analysis and the reference are excited at the same wavelength ( $P_0^{PS_{Ref}}/P_0^{PS} = 1$ ). This expression simplifies to Eq. S32 for the phenalenone reference since  $k_t^{PS_{Ref}}[PS_{Ref}] \ll k_d$  in the range of concentration considered ( $k_t^{Phe} = 3.2 \cdot 10^4 M^{-1} s^{-1}$ ).<sup>4</sup>

$$\frac{S_{e,PS}}{S_{e,PS_{Ref}}} \times \frac{\alpha_{PS_{Ref}}}{\alpha_{PS}} = \frac{\Phi_{\Delta}^{PS}}{\Phi_{\Delta}^{PS_{Ref}}} \times \frac{1}{(1 + \tau_{\Delta} k_t^{PS}[PS])} \quad \text{Eq. S32}$$

Under these conditions, the plot of  $(S_{e,PS_{Ref}}/S_{e,PS})(\alpha_{PS}/\alpha_{PS_{Ref}}) = f([PS])$  should be linear and give the values of  $k_t^{PS}$ . From our results (Figure S7), it may be concluded that  $k_t^{PS}[PS] < 0.1 \times k_d$ , which led to the upper limit of  $k_t^{PS}$  in Table 1.

From Eq. 30, an apparent value of  $\Phi_{\Delta}^{PS}$  ( $\Phi_{\Delta}^{PS_{app}}$ ) at the given PS concentration may be calculated:

$$\Phi_{\Delta}^{PS_{app}} = \Phi_{\Delta}^{PS} \frac{k_d}{(k_d + k_t^{PS}[PS])} = \Phi_{\Delta}^{PS} \times \frac{1}{(1 + \tau_{\Delta} k_t^{PS}[PS])} \quad \text{Eq. S33}$$

From Eq. 31, when  $k_t^{PS}[PS] \ll k_d$  (negligible  $^1O_2$  quenching by the PS in the range of concentrations used), the ratio  $S_{e,PS_{Ref}}/S_{e,PS}$  does not depend on the PS concentration and the quantum yield of  $^1O_2$  production by the PS,  $\Phi_{\Delta}^{PS}$ , is equal to  $\Phi_{\Delta}^{PS_{app}}$ :

$$\Phi_{\Delta}^{PS} = \Phi_{\Delta}^{PS_{Ref}} \frac{S_{e,PS}}{S_{e,PS_{Ref}}} \times \frac{\alpha_{PS_{Ref}}}{\alpha_{PS}} \quad \text{Eq. S34}$$

### 3. Determination of the rate constant of quenching of triplet state of MeSBDP by $\beta$ -carotene as triplet acceptor.

The triplet state of MeSBDP can be quenched by collisions in solution not only by molecular oxygen but also by other triplet acceptors. The triplet acceptor  $\beta$ -carotene was chosen here, since it does not absorb at the excitation wavelength  $\lambda_{\text{exc}} = 570$  nm (Figure S5A) and the energy of its low lying triple state is lower than the triplet state of MeSeBDP. The quenching was studied by time-resolved nanosecond transient absorption experiments at different  $\beta$ -carotene concentrations. In the presence of the triplet acceptor, the triplet lifetime of the MeSBDP decreases (Table S4, Figure S5B). The bimolecular quenching rate constant ( $k_{q,car}^T$ ) in chloroform is obtained from the Stern-Volmer plots  $1/\tau_T$  against  $\beta$ -carotene concentrations (Figure 7B), according to the Stern-Volmer equation:

$$\frac{1}{\tau_T} - \frac{1}{\tau_0} = k_{q,car}^T [\text{carotene}] \quad \text{Eq. S35}$$

The observed  $k_{q,car}^T$  was obtained by fitting the decay curve at 425 nm. The rate constants of quenching of triplet state of MeSBDP by triplet acceptors are usually in the time range of the diffusion rates,  $k_{diff}$  in a given solvent, determined by Eq. S36

$$k_{diff} = \frac{8 k_B T}{3 \eta} \quad \text{Eq. S36}$$

where  $k_B$  is the Boltzmann constant ( $1.38 \times 10^{-23} \text{ J K}^{-1}$ ),

$\eta$  is the viscosity of the solvent ( $0.53 \times 10^{-3} \text{ Pa}\cdot\text{s}$ )

From Eq. S38,  $k_{diff}$  in chloroform is  $12 \times 10^9 \text{ M}^{-1} \text{ s}^{-1}$ .

The same method was applied for triplet state quenching by  $\text{O}_2$ .

For the calculation of the singlet oxygen quantum yields ( $\Phi_{\Delta}^{PS}$ ) of MeSBDP according to Eq. S34 in the experimental section, the values in Table S2 for  $\Phi_{\Delta}^{Ref}$  ( $PS_{Ref}=PHE$ ) were used as reference.

Table S2: 1H-phenalen-1-one (PHE) singlet oxygen quantum yield ( $\Phi_{\Delta}^{Phe}$ ) from literature (except otherwise stated), singlet oxygen lifetimes ( $\tau_{\Delta}$ ), rate constant of singlet oxygen quenching by the solvent ( $k_d = 1/\tau_{\Delta}$ ).

| Solvent                     | $\Phi_{\Delta}^{Phe}$ | $\tau_{\Delta}^{***}$<br>( $\mu s$ ) | $k_d$<br>( $s^{-1}$ ) |
|-----------------------------|-----------------------|--------------------------------------|-----------------------|
| Cyclohexane                 | 0.92 <sup>4</sup>     | 27 (21 $\pm$ 4)                      | 3.70 $\times 10^4$    |
| Toluene                     | 0.92 <sup>5</sup>     | 27 (27 $\pm$ 2)                      | 3.70 $\times 10^4$    |
| Dioxane                     | 0.99 <sup>6</sup>     | 30                                   | 3.33 $\times 10^4$    |
| Chloroforme                 | 0.98 <sup>4</sup>     | 201 (235 $\pm$ 30)                   | 4.98 $\times 10^3$    |
| Dichlorometane              | 0.96 <sup>5</sup>     | 97 (101 $\pm$ 39)                    | 1.03 $\times 10^4$    |
| Acetone                     | 1*                    | 58 (50.5 $\pm$ 4)                    | 1.72 $\times 10^4$    |
| Acetonitrile                | 1 <sup>5</sup>        | 81 (66.7 $\pm$ 13.5)                 | 1.23 $\times 10^4$    |
| EtOH                        | 0.92 <sup>5</sup>     | 18 (15.5 $\pm$ 3.5)                  | 5.56 $\times 10^4$    |
| MeOD                        | 0.98**                | 37                                   | 2.70 $\times 10^4$    |
| MeOH                        | 0.98 <sup>4</sup>     | 10 (9.9 $\pm$ 0.5)                   | 9.09 $\times 10^4$    |
| D <sub>2</sub> O:MeOD (1:1) | 1*                    | 45                                   | 2.22 $\times 10^4$    |
| D <sub>2</sub> O            | 0.97 <sup>5</sup>     | n.d.                                 | n.d.                  |

\*we have used 1 for acetone and D<sub>2</sub>O:MeOD (1:1) as there is not value in the literature

\*\*we have used the same values as MeOH as there is not value in the literature

\*\*\*Values measured in our group

Table S3: Maximum concentration of PS,  $[PS]_{max}$ , singlet oxygen lifetime in the considered solvent ( $\tau_{\Delta}$ ), constant of singlet oxygen quenching by the solvent ( $k_d$ ), and maximum rate constant of singlet oxygen total quenching by PS.

| Solvent                     | $[PS]_{max}$<br>(M)  | $\tau_{\Delta}$<br>( $\mu s$ ) | $k_d$<br>( $s^{-1}$ ) | $k_t^{PS}$<br>( $M^{-1}s^{-1}$ ) |
|-----------------------------|----------------------|--------------------------------|-----------------------|----------------------------------|
| Cyclohexane                 | 8.7 $\times 10^{-5}$ | 27                             | 3.70 $\times 10^4$    | 4.3 $\times 10^7$                |
| Toluene                     | 4.5 $\times 10^{-5}$ | 27                             | 3.70 $\times 10^4$    | 8.2 $\times 10^7$                |
| Dioxane                     | 7.4 $\times 10^{-5}$ | 30                             | 3.33 $\times 10^4$    | 4.5 $\times 10^7$                |
| Chloroform                  | 3.8 $\times 10^{-5}$ | 201                            | 4.98 $\times 10^3$    | 1.3 $\times 10^7$                |
| Dichloromethane             | 6.5 $\times 10^{-5}$ | 97                             | 1.03 $\times 10^4$    | 1.6 $\times 10^7$                |
| Acetone                     | 3.8 $\times 10^{-5}$ | 58                             | 1.72 $\times 10^4$    | 4.5 $\times 10^7$                |
| Acetonitrile                | 4.5 $\times 10^{-5}$ | 81                             | 1.23 $\times 10^4$    | 2.7 $\times 10^7$                |
| EtOH                        | 5.9 $\times 10^{-5}$ | 18                             | 5.56 $\times 10^4$    | 9.4 $\times 10^7$                |
| MeOD                        | 7.1 $\times 10^{-5}$ | 37                             | 2.70 $\times 10^4$    | 3.8 $\times 10^7$                |
| MeOH                        | 8.8 $\times 10^{-5}$ | 10                             | 9.09 $\times 10^4$    | 1.1 $\times 10^8$                |
| D <sub>2</sub> O:MeOD (1:1) | 7.2 $\times 10^{-5}$ | 45                             | 2.22 $\times 10^4$    | 3.8 $\times 10^7$                |

Table S4: Result of triplet lifetime ( $\tau_{obs}^T$ ),  $\lambda_{ex}=570\text{ nm}$ ,  $\lambda_{em}=425\text{ nm}$  after degassing by nitrogen for 10 minutes.

| Solution | Concentration<br>$\beta$ -Carotene (M) | $\tau_{obs}^T$<br>(ns) | $1/\tau_{obs}^T$<br>(ns <sup>-1</sup> ) |
|----------|----------------------------------------|------------------------|-----------------------------------------|
| A        | 0                                      | 34300                  | $2.9 \times 10^{-5}$                    |
| B        | $8.2 \times 10^{-7}$                   | 22000                  | $4.5 \times 10^{-5}$                    |
| C        | $2.4 \times 10^{-6}$                   | 17500                  | $5.7 \times 10^{-5}$                    |
| D        | $2.5 \times 10^{-6}$                   | 15100                  | $6.6 \times 10^{-5}$                    |
| E        | $4.1 \times 10^{-6}$                   | 13200                  | $7.6 \times 10^{-5}$                    |
| F        | $7.2 \times 10^{-6}$                   | 11000                  | $9.1 \times 10^{-5}$                    |
| G        | $8.2 \times 10^{-6}$                   | 8100                   | $1.2 \times 10^{-4}$                    |
| H        | $1.2 \times 10^{-5}$                   | 6500                   | $1.5 \times 10^{-4}$                    |
| I        | $1.6 \times 10^{-5}$                   | 4100                   | $2.4 \times 10^{-4}$                    |
| J        | $2.4 \times 10^{-5}$                   | 3000                   | $3.3 \times 10^{-4}$                    |

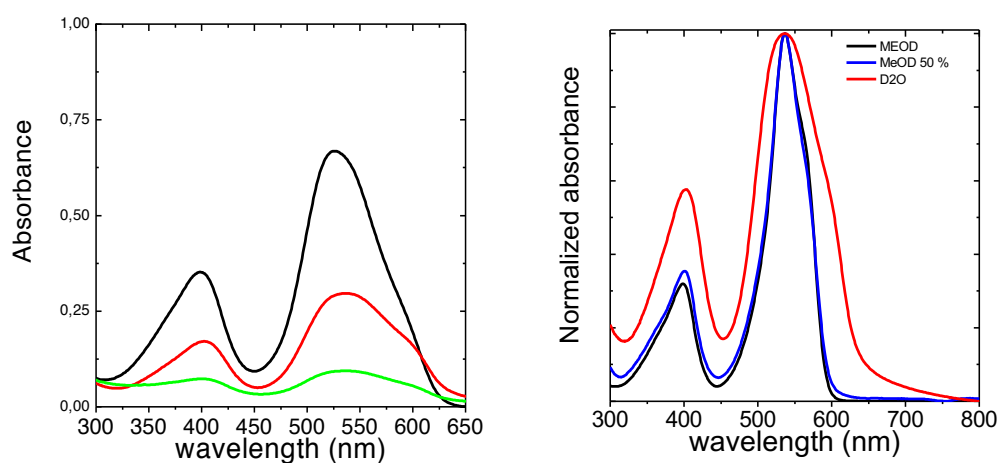

Figure S1: Left: absorption spectra of MeSBDP in D<sub>2</sub>O ( $5.6 \times 10^{-6}\text{ M}$  (green),  $1.8 \times 10^{-5}\text{ M}$  (red) and  $3.5 \times 10^{-5}\text{ M}$  (black)); Right: Normalized absorption spectra of different solutions of MeSBDP in MeOD (black), D<sub>2</sub>O (red) and MeOD/D<sub>2</sub>O 50/50% (blue).

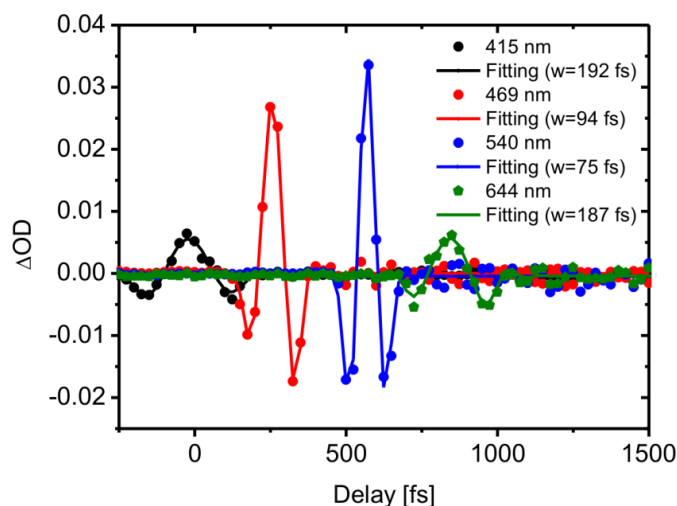

Figure S2. IRF at selected probe wavelengths measured in chloroform. The amplitude of the transient at 644 nm has been multiplied by a factor 2 to improve its visibility.

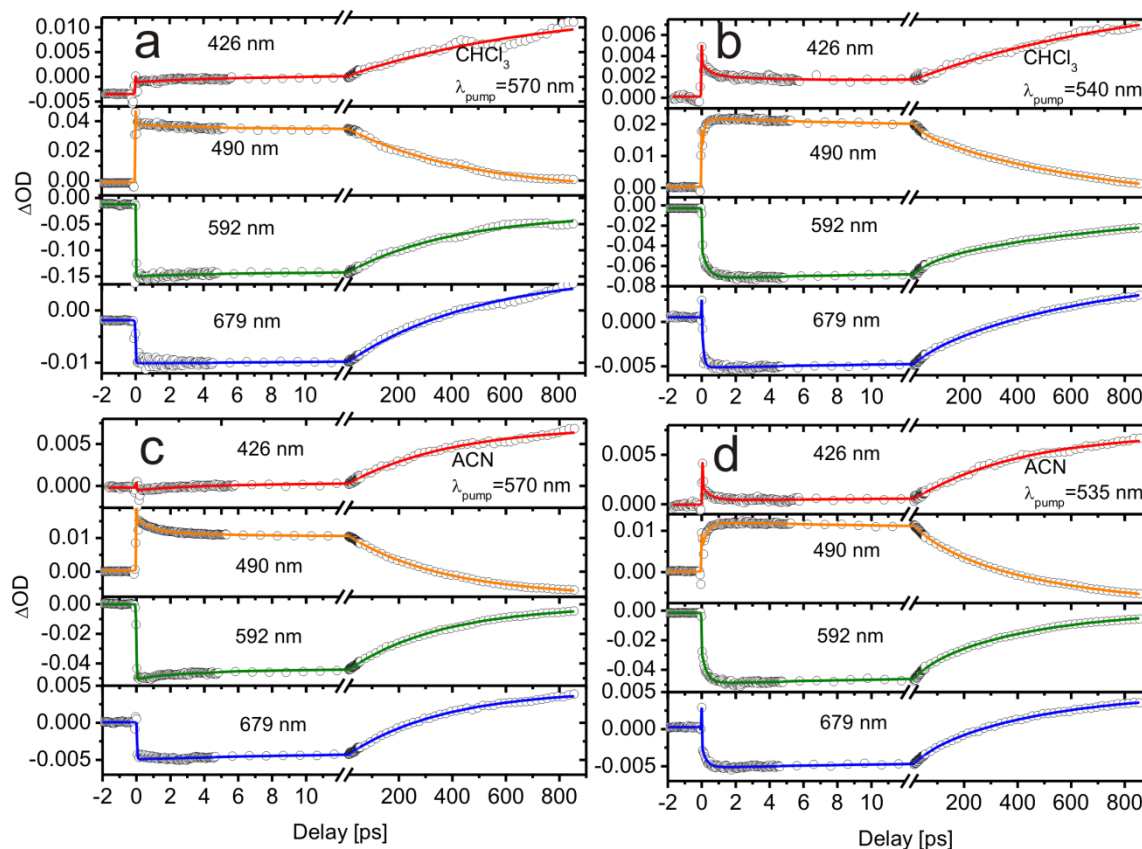

Figure S3: Temporal evolution of the main fs-TA bands of MeSBDP in chloroform (a,b) and acetonitrile (c,d) resulting from excitation at the indicated wavelength. Solid lines represent the fitting with a multiexponential decay convoluted with the instrumental response function ( $\sim 100$  fs). Each data set is shown together with the corresponding multiexponential fit. In any case, a triexponential fit with time constants  $\tau_1 \sim 1$  ps,  $\tau_2 \sim 500$  ps and  $\tau_3 \gg 1$  ns was introduced, except for the results corresponding to excitation at higher energies (540 nm for  $\text{CHCl}_3$  and 535 nm for  $\text{CH}_3\text{CN}$ ), which required an additional decay ( $\tau_2 \sim 70$  ps) to satisfactorily reproduce the experimental data.



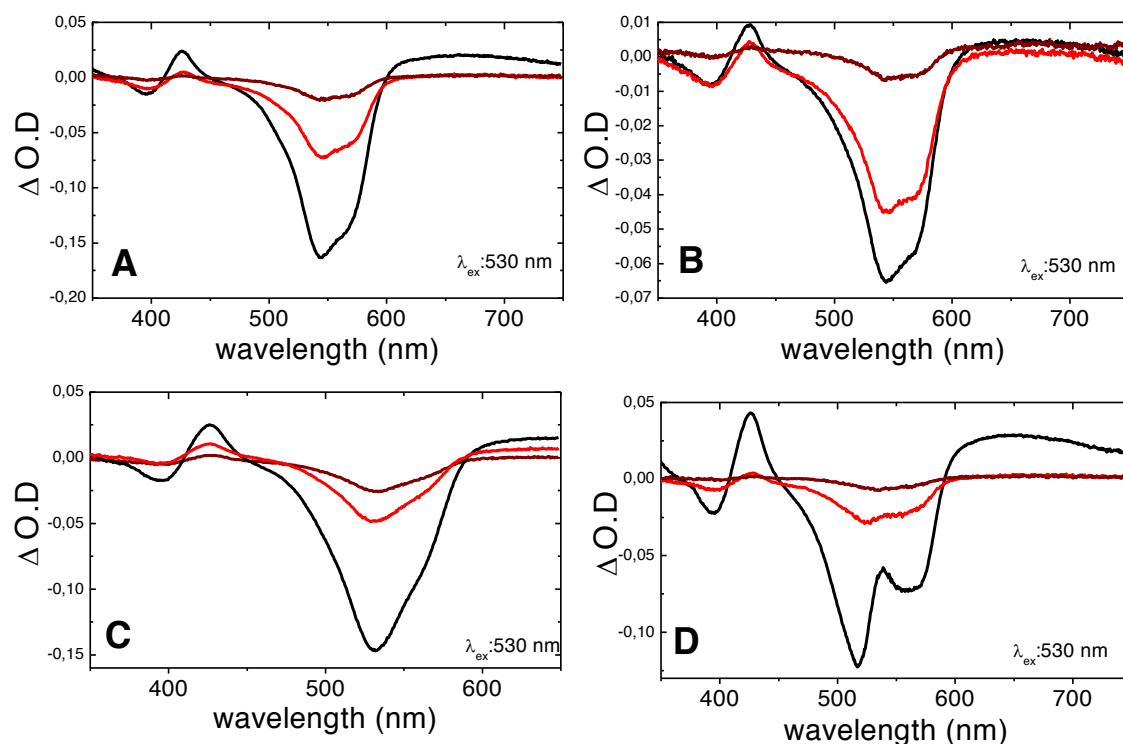

Figure S4: ns-transient absorption spectra recorded during 1 microsecond in air-saturated (red), nitrogen-saturated (black) and oxygen-saturated (brown) in toluene (A) chloroform (B), acetonitrile (C) and methanol (D).  $\lambda_{ex} = 530$  nm

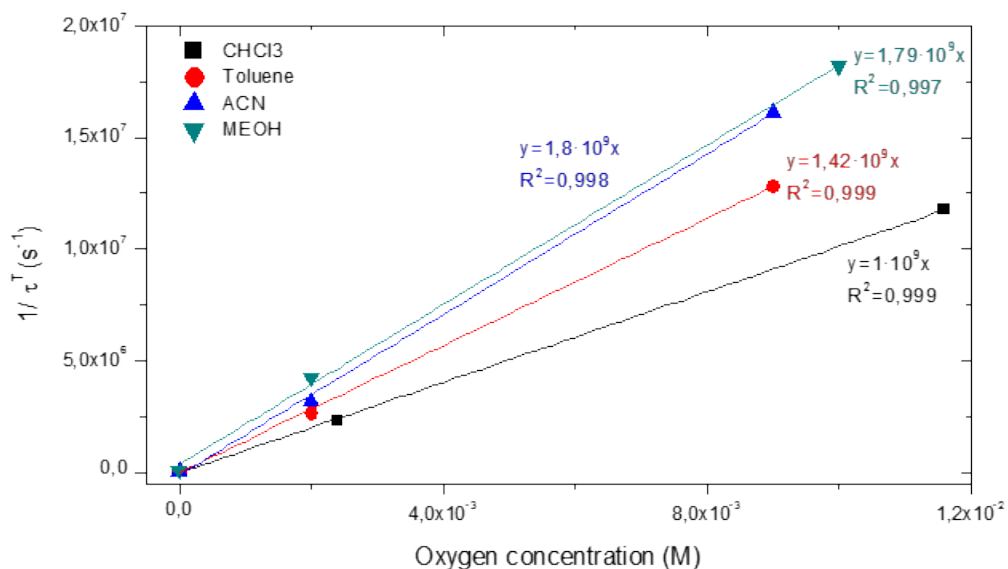

Figure S5: Determination of the bimolecular rate constants of triplet quenching of MeSBDP by molecular oxygen ( $k_{q,o_2}^T$ ) at room temperature in CHCl<sub>3</sub> (black square), toluene (red circle), acetonitrile (blue triangle) and methanol (green triangle).

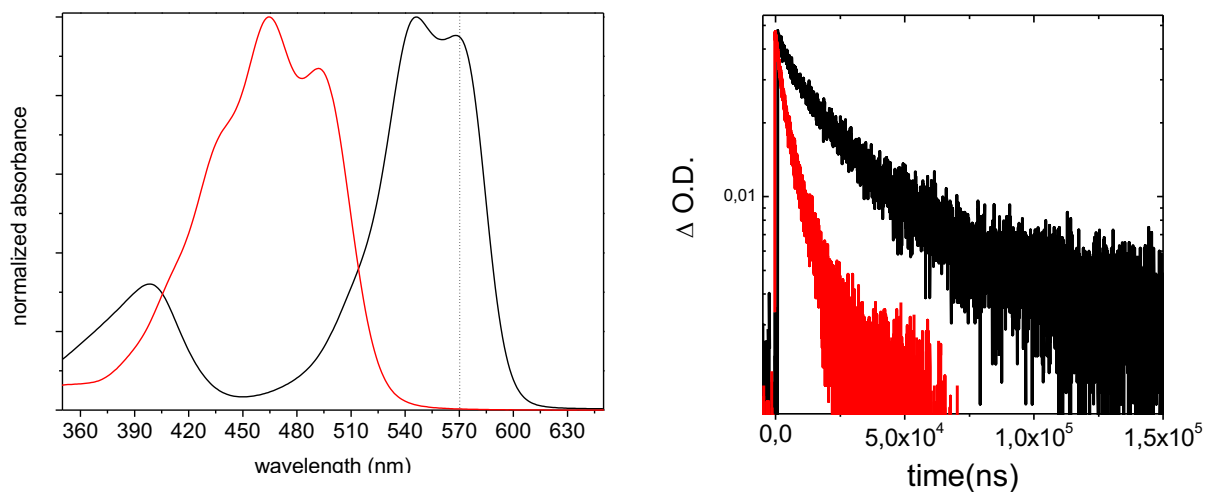

Figure S6: Left) Normalized absorption spectra of MeSBDP (black) and of the triplet acceptor  $\beta$ -carotene (red) in chloroform. Right) Decay curves of triplet  $^3\text{MeSBDP}^*$  in the absence of  $\beta$ -carotene (black curve) and in the presence of  $\beta$ -carotene at  $4.1 \times 10^{-6}$  M (red curve), recorded at 425 nm under  $\lambda_{\text{ex}}$  570 nm in  $\text{N}_2$  degassed chloroform solutions.

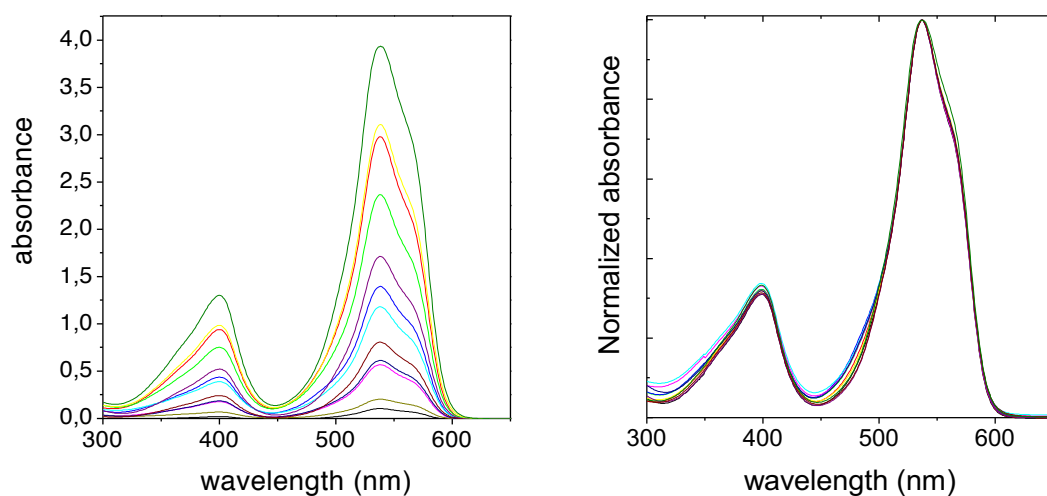

Figure S7: Left) Absorption spectra of MeSBDP in MeOH at different concentration between  $2.6 \times 10^{-6}$  to  $8.8 \times 10^{-5}$  M; Right) Normalized absorption spectra

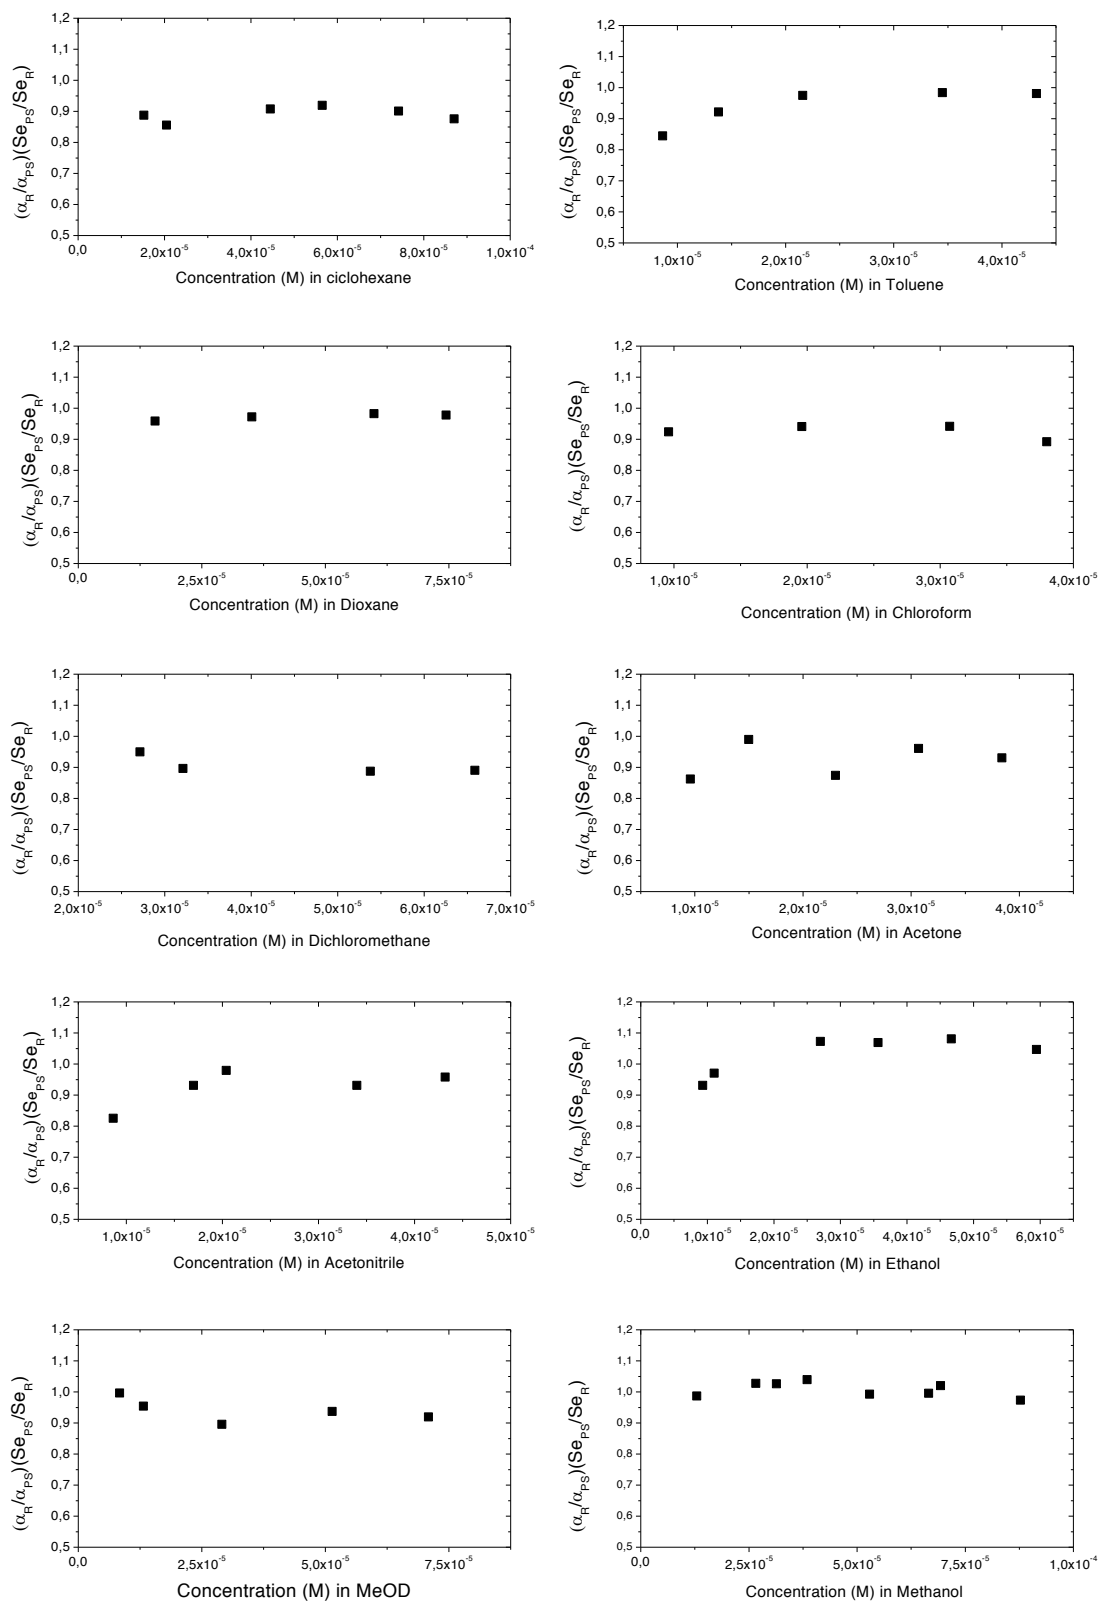

Figure S8: Variation of the ratio  $(S_{0,PSRef}/S_{0,PS})(\alpha_{PS}/\alpha_{PSRef})$  of singlet oxygen emission signal for MeSBDP as a function of MeSBDP concentration in representative solvents at room temperature. Error: approx. 10%

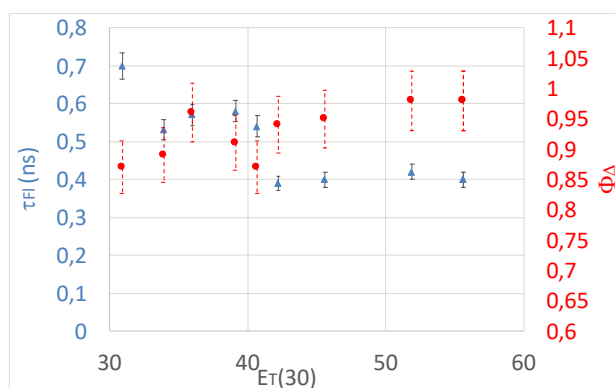

Figure S9: Evolution of fluorescence lifetime and singlet oxygen quantum yield with the solvent polarity

## REFERENCES:

- 1 F. Wilkinson, W. P. Helman and A. B. Ross, Rate Constants for the Decay and Reactions of the Lowest Electronically Excited Singlet State of Molecular Oxygen in Solution. An Expanded and Revised Compilation, *J. Phys. Chem. Ref. Data*, 1995, **24**, 663–1021.
- 2 R. D. Scurlock, S. Nonell, S. E. Braslavsky and P. R. Ogilby, Effect of Solvent on the Radiative Decay of Singlet Molecular Oxygen ( $a^1\Delta_g$ ), *J. Phys. Chem.*, 1995, **99**, 3521–3526.
- 3 L. A. Martinez, C. G. Martinez, B. B. Klopotek, J. Lang, A. Neuner, A. M. Braun and E. Oliveros, Nonradiative and radiative deactivation of singlet molecular oxygen ( $O_2(a^1\Delta_g)$ ) in micellar media and microemulsions, *J. Photochem. Photobiol. B*, 2000, **58**, 94–107.
- 4 R. Schmidt, C. Tanielian, R. Dunsbach and C. Wolff, Phenalenone, a universal reference compound for the determination of quantum yields of singlet oxygen  $O_2(^1\Delta_g)$  sensitization, *J. Photochem. Photobiol. Chem.*, 1994, **79**, 11–17.
- 5 C. Martí, O. Jürgens, O. Cuenca, M. Casals and S. Nonell, Aromatic ketones as standards for singlet molecular oxygen  $O_2(^1\Delta_g)$  photosensitization. Time-resolved photoacoustic and near-IR emission studies, *J. Photochem. Photobiol. Chem.*, 1996, **97**, 11–18.
- 6 E. Oliveros, S. H. Bossmann, S. Nonell, C. Martí, G. Heit, G. Tröschner, A. Neuner, C. Martínez and A. M. Braun, Photochemistry of the singlet oxygen [ $O_2(^1\Delta_g)$ ] sensitizer perinaphthenone (phenalenone) in N,N'-dimethylacetamide and 1,4-dioxane, *New J. Chem.*, 1999, **23**, 85–93.
